# Supplementary material
Source: Springer Nature journal article supplement (https://www.springermedizin.de/resource/supplementary/12997_2005_11_MOESM1_ESM.pdf/9623080)

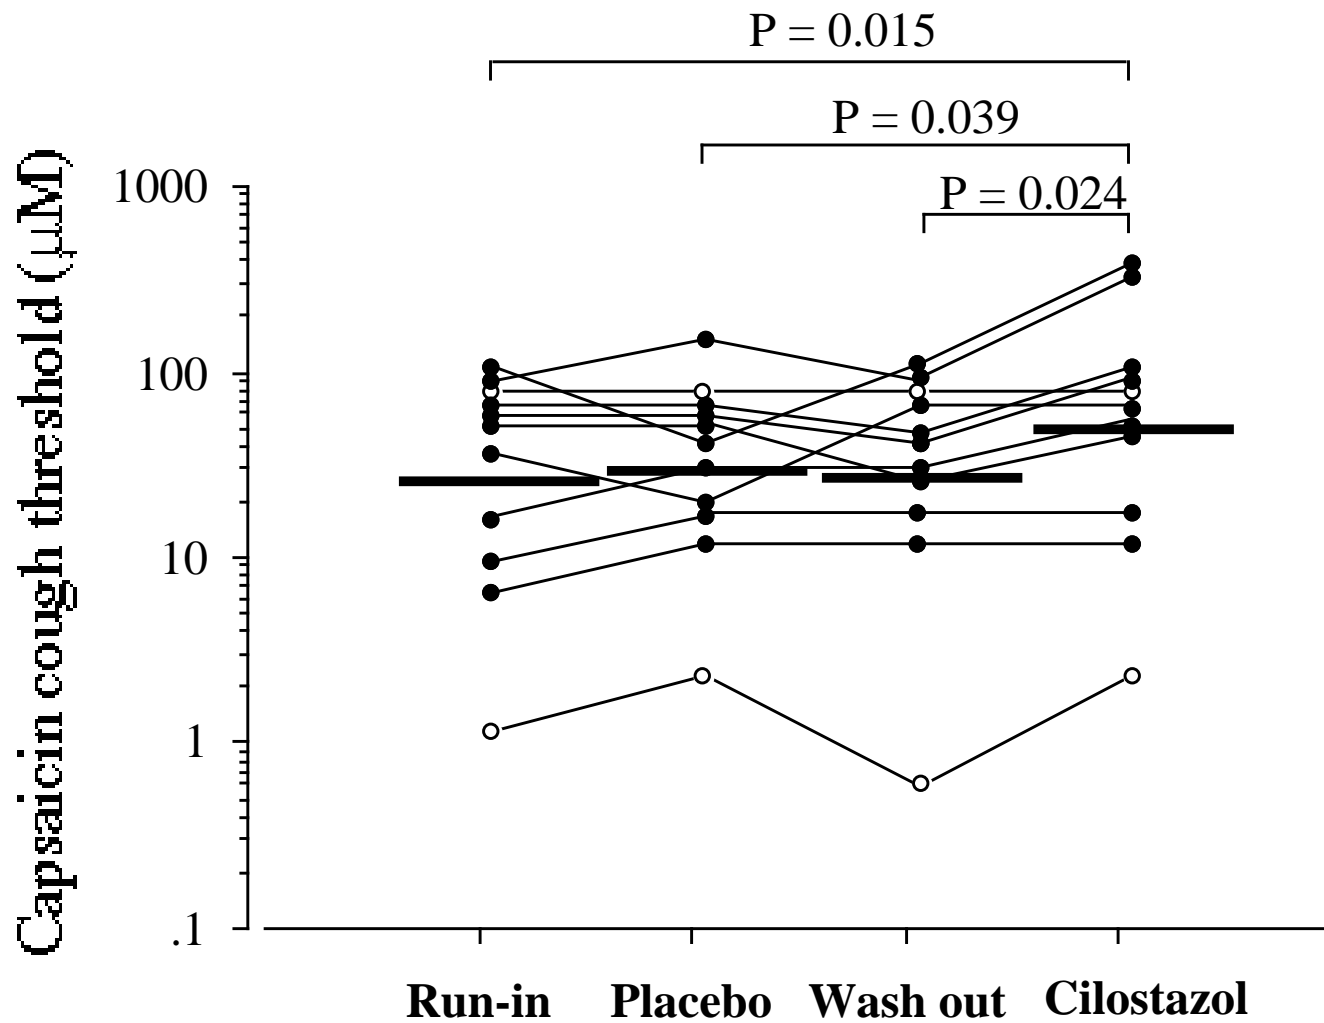

Supplement: MOESM1 [file 9623080]
